# Supplementary material for: The Rise of Hypothesis-Driven Artificial Intelligence in Oncology
Source: MDPI journal article supplement (doi:10.3390/cancers16040822), 2024-02-18
Supplement: s1 [file s1]

**Supplementary Table S1:** Summary of different hypothesis-driven AI algorithms and their application in oncology research.

| AI Model            | AI Method                    | Hypothesis                                                                                                                                                                                          | Application Area | Key Advancements                                                                                                              | Future Challenges                                                                                                                 |
|---------------------|------------------------------|-----------------------------------------------------------------------------------------------------------------------------------------------------------------------------------------------------|------------------|-------------------------------------------------------------------------------------------------------------------------------|-----------------------------------------------------------------------------------------------------------------------------------|
| OncoNPC             | Deep Learning                | Accurate primary cancer-type predictions using OncoNPC lead to meaningful clinical benefits for patients with Cancer of Unknown Primary (CUP)                                                       | Tumor Detection  | Trained on targeted NGS data to identify specific cancer types; Improved outcomes for CUP patients with concordant treatments | More diverse patient populations to show the generalizability of the AI are needed                                                |
| MALANI              | Support vector machine (SVM) | Class II cancer genes act as "signal linkers" between mutated and differentially expressed genes; A machine learning-based approach like MALANI can identify these elusive Class II cancer genes    | Cancer Genome    | Focuses on identifying "dark" cancer genes; Uses SVM to detect dark genes or Class II genes                                   | Experimental validation of identified genes and expansion to more cancer types and larger sample sizes for robustness can be done |
| Symbolic Regression | Genetic Algorithm            | Incorporating three filters into GP-based SR, along with nonlinear least-squares optimization, improves predictive ability of SR models while generating simpler and more interpretable expressions | Drug Response    | Generates interpretable QSAR/QSPR models; Bridges gap between complex biological relationships and therapeutic interventions  | Refining approach and generating simple predictive expressions for all types of analysis                                          |

| AI Model                                              | AI Method                 | Hypothesis                                                                                                                                                                                                         | Application Area           | Key Advancements                                                                                                                                               | Future Challenges                                                                                                                                                                                                         |
|-------------------------------------------------------|---------------------------|--------------------------------------------------------------------------------------------------------------------------------------------------------------------------------------------------------------------|----------------------------|----------------------------------------------------------------------------------------------------------------------------------------------------------------|---------------------------------------------------------------------------------------------------------------------------------------------------------------------------------------------------------------------------|
| Biologically Informed Deep Neural Network (P-Net)     | Deep Learning             | Evolutionarily conserved biological interactions and hierarchical structures hold critical information flows; Deep neural networks can recapitulate these interactions and shed light on underlying cancer biology | Cancer State Determination | Biologically informed deep learning model based on sparse deep learning architectures; Integrates diverse molecular features for enhanced predictability       | Current model's performance is contingent on the quality and accuracy of biological pathway annotations, which can be further improved; Validation of model for other cancer types except for prostate cancer can be done |
| ANNE (Weight Engineering)                             | Artificial Neural Network | Weight engineering approach decodes gene-gene associations from ANNs trained on omics data; Provides mechanistic insights into clinical phenotypes                                                                 | Gene-Gene Association      | Focuses on extracting biologically meaningful knowledge from ANNs; Uses weight engineering to interpret network connections                                    | Findings would benefit from further experimental validation and application to other cancer types                                                                                                                         |
| Spatially Informed AI for Cell Organization (SPIN-AI) | Deep Learning             | Spatially predictive genes (SPGs) govern cellular organization; Deep learning on spatial transcriptomic data can uncover spatial relationships in cellular environments                                            | Tumor Microenvironment     | Utilizes deep learning to predict spatial coordinates of gene expression spots; Provides insights into cellular organization in pathological microenvironments | Current model's effectiveness may be influenced by specific characteristics of tumor microenvironment; Applicability to other biological conditions or tissues can be explored                                            |

| AI Model                                  | AI Method     | Hypothesis                                                                                                                                                                                              | Application Area     | Key Advancements                                                                                                                      | Future Challenges                                                                                                                                                               |
|-------------------------------------------|---------------|---------------------------------------------------------------------------------------------------------------------------------------------------------------------------------------------------------|----------------------|---------------------------------------------------------------------------------------------------------------------------------------|---------------------------------------------------------------------------------------------------------------------------------------------------------------------------------|
| Visible Machine Learning approach (DCell) | Deep Learning | Hierarchical structure of biological systems encodes valuable information; Incorporating extensive knowledge of cell biology makes DCell a visible neural network with an interpretable inner structure | Phenotype Prediction | Models eukaryotic cell's hierarchical structure and function; Accurately simulates cellular growth influenced by genetic interactions | Effectiveness of the current model is influenced by specific characteristics of the cellular system; Applicability to other organisms or cell types requires further validation |
